# Supplementary material for: Multidisciplinary Tumor Board Smart Virtual Assistant in Locally Advanced Cervical Cancer (LACC): a proof of concept
Source: Research Square preprint supplement (doi:10.21203/rs.3.rs-288047/v1), 2021-03-17
Supplement: Supplementary file 1 [file 17e593c9f9c28fa07197568e.docx]

Table 1a. Clinical features included in the 3 diagnostic exams and data types


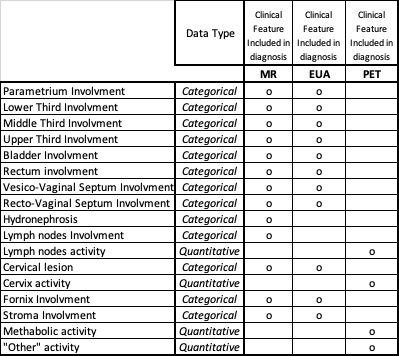


Legend: MR: Magnetic resonance; EUA: Examination under anesthesia; PET: positron emission tomography

Table 1b. Example of a patient’s pattern with convergent and conflicting features


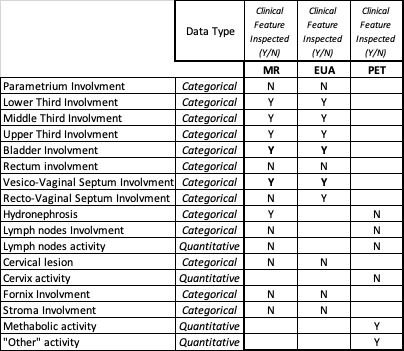


Legend: MR: Magnetic resonance; EUA: Examination under anesthesia; PET: positron emission tomography
